# Supplementary material for: Risankizumab in Patients with Moderate-to-Severe Atopic Dermatitis: A Phase 2, Randomized, Double-Blind, Placebo-Controlled Study
Source: Springer Nature journal article supplement (doi:10.1007/s13555-022-00876-x), 2023-01-02
Supplement: MOESM1 [file 23881674]

**Risankizumab in Patients With Moderate to Severe Atopic Dermatitis: A Phase 2,  
Randomized, Double-Blind, Placebo-Controlled Study**

Stephen K. Tyring<sup>1</sup>, Phoebe Rich<sup>2</sup>, Yayoi Tada<sup>3</sup>, Stefan Beeck<sup>4</sup>, Izabella Messina<sup>4</sup>, Jie Liu<sup>4</sup>,  
Xiaohong Huang<sup>4</sup>, Stephen Shumack<sup>5</sup>

<sup>1</sup>University of Texas Health Science Center, McGovern Medical School, Houston, TX, USA;

<sup>2</sup>Oregon Health and Science University, Portland, OR, USA; <sup>3</sup>Teikyo University School of  
Medicine, Tokyo, Japan; <sup>4</sup>AbbVie Inc., North Chicago, IL, USA; <sup>5</sup>St George Dermatology and  
Skin Cancer Centre, Kogarah, NSW, Australia

**Corresponding Author**

Stephen K. Tyring, MD, PhD

Department of Dermatology, University of Texas Health Science Center, McGovern Medical  
School, 6431 Fannin St, Houston, TX, 77030 USA

Phone: (713) 500-8260

Email: [styring@ccstexas.com](mailto:styring@ccstexas.com)

## Supplementary Materials

**Table S1. List of Independent Ethics Committees/Institutional Review Boards per Study Site**

| <b>Country</b> | <b>Study Site</b>                                                                 | <b>Independent Ethics Committee/Institutional Review Board</b>                               |
|----------------|-----------------------------------------------------------------------------------|----------------------------------------------------------------------------------------------|
| Australia      | Skin Health Institute Inc<br>Peter Foley                                          | <b>Central:</b><br>Bellberry Limited Human Research Ethics Committee                         |
|                | Fremantle Dermatology<br>Kurt Gebauer                                             | <b>Central:</b><br>Bellberry Limited Human Research Ethics Committee                         |
|                | Paratus Clinical Research, Woden Dermatology<br>Diana Rubel                       | <b>Central:</b><br>Bellberry Limited Human Research Ethics Committee                         |
|                | St George Hospital<br>Stephen Shumack                                             | <b>Central:</b><br>Bellberry Limited Human Research Ethics Committee                         |
|                | North Eastern Health Specialists, Probitry Medical Research Inc.<br>Shireen Sidhu | <b>Central:</b><br>Bellberry Limited Human Research Ethics Committee                         |
|                | Veracity Clinical Research<br>Lynda Spelman                                       | <b>Central:</b><br>Bellberry Limited Human Research Ethics Committee                         |
| Canada         | Dr. Angelique Gagne-Henley M.D. Inc.<br>Angelique Gagne-Henley                    | <b>Central:</b><br>Advarra                                                                   |
|                | University of Alberta Hospital – Division of Dermatology<br>Robert Gniadecki      | <b>Central:</b><br>Advarra<br><b>Local:</b><br>Health Research Ethics Board-Biomedical Panel |
|                | DermEffects<br>Wei Jing Loo                                                       | <b>Local:</b><br>Research Review Board Inc                                                   |
|                | Beacon Dermatology Inc<br>Andrei Metelitsa                                        | <b>Local:</b><br>Health Research Ethics Board-Biomedical Panel                               |
|                | Medicor Research Inc<br>Tiffany Parsons                                           | <b>Central:</b><br>Advarra                                                                   |
| Japan          | Nippon Medical School Musashi Kosugi Hospital<br>Shinichi Ansai                   | <b>Local:</b><br>Nippon Medical School Musashi Kosugi Hospital Institutional Review Board    |
|                | Hamamatsu University Hospital<br>Toshiharu Fujiyama                               | <b>Local:</b><br>Hamamatsu University Hospital Institutional Review Board                    |
|                | Kurume University Hospital<br>Norito Ishii                                        | <b>Local:</b>                                                                                |

|               |                                                                 |                                                                                                    |
|---------------|-----------------------------------------------------------------|----------------------------------------------------------------------------------------------------|
|               |                                                                 | The Institutional Review Board of Kurume University Hospital                                       |
|               | Chukyo Hospital<br>Masanari Kodera                              | <b>Local:</b><br>Chukyo Hospital Institutional Review Board                                        |
|               | Tokyo Teishin Hospital<br>Hiroshi Mitsui                        | <b>Local:</b><br>Tokyo Teishin Hospital Institutional Review Board                                 |
|               | Tokyo Medical University Hospital<br>Yukari Okubo               | <b>Local:</b><br>Tokyo Medical University Institutional Review Board                               |
|               | Teikyo University Hospital<br>Yayoi Tada                        | <b>Local:</b><br>Teikyo University Hospital Institutional Review Board                             |
|               | Osaka Metropolitan University Hospital<br>Chiharu Tateishi      | <b>Local:</b><br>Osaka Metropolitan University Hospital Clinical Trial Institutional Review Board  |
|               | Nagaoka Red Cross Hospital<br>Yukie Umemori                     | <b>Local:</b><br>Nagaoka Red Cross Hospital Institutional Review Board                             |
|               | University of the Ryukyus Hospital<br>Sayaka Yamaguchi          | <b>Local:</b><br>University of the Ryukyus Hospital Institutional Review Board                     |
| Puerto Rico   | Dr. Alma Cruz-Santana Carolina, PR<br>Alma Cruz-Santana         | <b>Central:</b><br>Advarra                                                                         |
|               | Clinical Research Puerto Rico<br>Maria Martinez-Colon           | <b>Central:</b><br>Advarra                                                                         |
|               | Los Prados Medical Gallery<br>Samuel Sanchez-Rivera             | <b>Central:</b><br>Advarra                                                                         |
| United States | Acclaim Dermatology<br>Syed Ali                                 | <b>Central:</b><br>Advarra                                                                         |
|               | Colorado Center for Dermatology, PLLC<br>Theodore Alkousakis    | <b>Central:</b><br>Advarra                                                                         |
|               | Psoriasis Treatment Center of Central New Jersey<br>Jerry Bagel | <b>Central:</b><br>Advarra                                                                         |
|               | Health Concepts<br>Richard Beasley                              | <b>Central:</b><br>Advarra                                                                         |
|               | Dermatologic SurgiCenter<br>Anthony Benedetto                   | <b>Central:</b><br>Advarra                                                                         |
|               | Therapeutics Clinical Research<br>Neal Bhatia                   | <b>Central:</b><br>Advarra                                                                         |
|               | Tulane University<br>Erin Boh                                   | <b>Central:</b><br>Advarra<br><b>Local:</b><br>Tulane University Human Research Protection Program |
|               | Great Lakes Research Group<br>Brent Boyce                       | <b>Central:</b><br>Advarra                                                                         |

|                                                                                           |                                                     |
|-------------------------------------------------------------------------------------------|-----------------------------------------------------|
| Oakland Hills Dermatology<br>Cristofer Buatti                                             | <b>Central:</b><br>Advarra                          |
| Skin Care Physicians of Georgia<br>David Cohen                                            | <b>Central:</b><br>Advarra                          |
| Darst Dermatology<br>Marc Darst                                                           | <b>Central:</b><br>Advarra                          |
| Center for Dermatology Clinical research<br>Sunil Dhawan                                  | <b>Central:</b><br>Advarra                          |
| University Dermatology and Vein Clinic, LLC<br>Vassilios Dimitropoulos                    | <b>Central:</b><br>Advarra                          |
| Cosmetic Dermatology of Orange County<br>Cheryl Effron                                    | <b>Central:</b><br>Advarra                          |
| University of Alabama at Birmingham<br>Department of Dermatology<br>Boni Elewski          | <b>Local:</b><br>Western Institutional Review Board |
| University of Pittsburgh Medical Center<br>Laura Ferris                                   | <b>Central:</b><br>Advarra                          |
| RI Skin Doc<br>Ellen Frankel                                                              | <b>Central:</b><br>Advarra                          |
| Cosmetic Laser Dermatology<br>Mitchel Goldman                                             | <b>Central:</b><br>Advarra                          |
| Grekin Skin Institute of Wyandotte<br>Steven Grekin                                       | <b>Central:</b><br>Advarra                          |
| The Indiana Clinical Trials Center<br>Scott Guenthner                                     | <b>Central:</b><br>Advarra                          |
| Skin Cancer and Dermatology Institute<br>Michael Heaphy                                   | <b>Central:</b><br>Advarra                          |
| Virginia Dermatology & Skin Cancer Center<br>Brian Johnson                                | <b>Central:</b><br>Advarra                          |
| Omega Medical Research<br>John Kelly                                                      | <b>Central:</b><br>Advarra                          |
| Dominion Medical Associates Inc.<br>Yvonne Knight                                         | <b>Central:</b><br>Advarra                          |
| Unity Clinical Research<br>Jarad Levin                                                    | <b>Central:</b><br>Advarra                          |
| DermAssociates- Rockville<br>Benjamin Lockshin                                            | <b>Central:</b><br>Advarra                          |
| Rivergate Dermatology & Skin Care Center<br>Keith Loven                                   | <b>Central:</b><br>Advarra                          |
| Arlington Research Center, Inc<br>Angela Moore                                            | <b>Central:</b><br>Advarra                          |
| The Vancouver Clinic, INC. PS<br>Viet Nguyen                                              | <b>Central:</b><br>Advarra                          |
| CCT Research at Center for Dermatology &<br>plastic Surgery – Scottsdale<br>Anthony Nuara | <b>Central:</b><br>Advarra                          |
| MetroDerm ACC Research, LLC.<br>Diamondis Papadopoulos                                    | <b>Central:</b><br>Advarra                          |
| Oregon Dermatology and Research Center<br>Phoebe Rich                                     | <b>Central:</b><br>Advarra                          |

|  |                                                              |                                                                 |
|--|--------------------------------------------------------------|-----------------------------------------------------------------|
|  | Tekton Research, Inc.<br>Blakely Richardson                  | <b>Central:</b><br>Advarra                                      |
|  | Dermdox Dermatology Centers, PC<br>Stephen Schleicher        | <b>Central:</b><br>Advarra                                      |
|  | Park Avenue Dermatology<br>George Schmieder                  | <b>Central:</b><br>Advarra                                      |
|  | Dermatologists of Southwest Ohio, Inc<br>Rocco Serrao        | <b>Central:</b><br>Advarra                                      |
|  | Integrative Skin Science and Research<br>Raja Sivamani       | <b>Central:</b><br>Advarra<br><b>Local:</b><br>Integ Review IRB |
|  | Center for Clinical Studies - Houston<br>Stephen Tyring      | <b>Central:</b><br>Advarra                                      |
|  | Dermatology Associates of Plymouth Meeting<br>Jonathan Wolfe | <b>Central:</b><br>Advarra                                      |
